# Supplementary material for: Combined1H-NMR and1H–13C HSQC-NMR to improve urinary screening in autism spectrum disorders
Source: Royal Society of Chemistry journal article supplement (doi:10.1039/c4an00552j), 2014-01-01

**Figure S1** : PCA scores scatter plot obtained from  $^1\text{H-NMR}$  urinary spectra of control (blue) and autistic (red) children. The NMR intensity bins were scaled to the total spectral intensity.

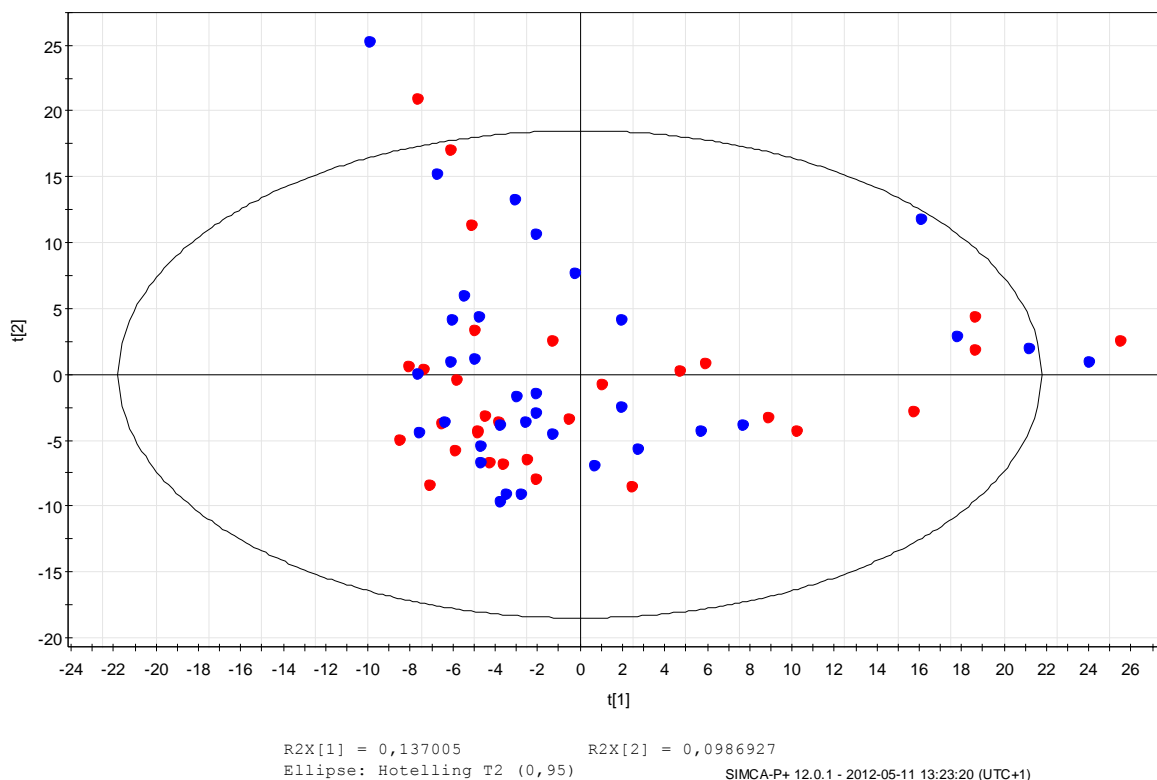

**Figure S2**: Validate model plot of the PLS-DA obtained with the  $^1\text{H NMR}$  data to test the overfitting of the data (intercepts  $Q^2=(0.0, -0.137)$   $R^2=(0.0, -0.258)$ ).

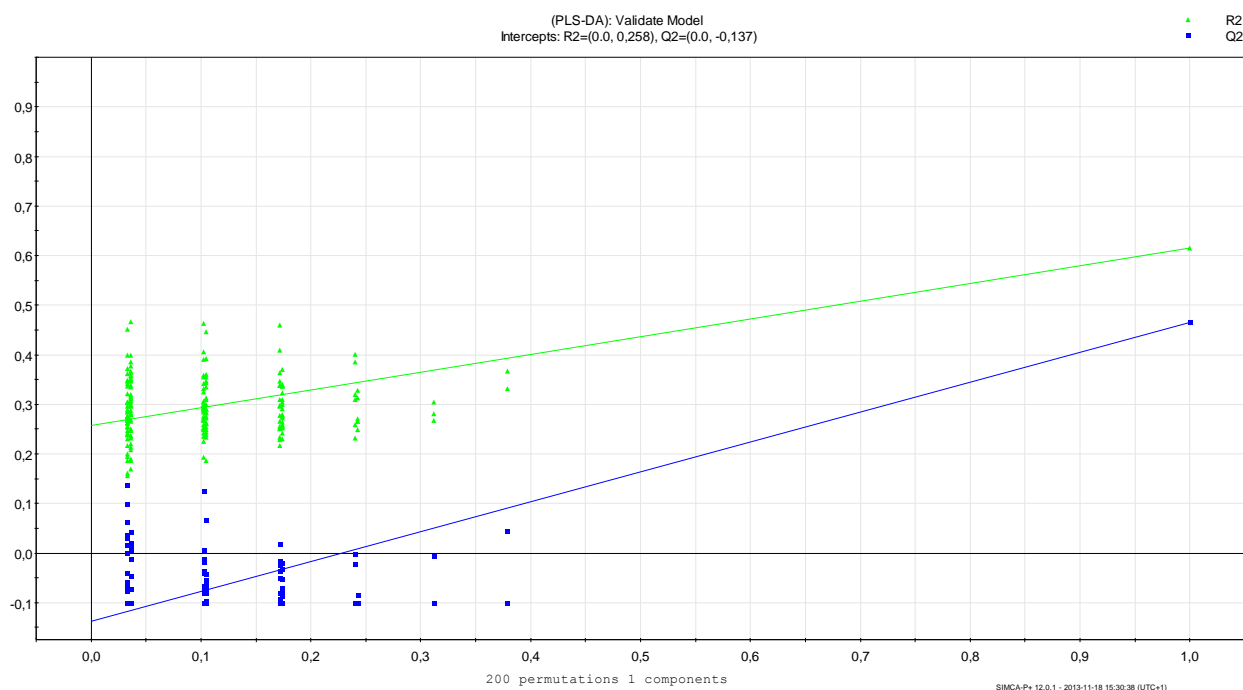

**Figure S3**: Contribution plot obtained from  $^1\text{H-NMR}$  urinary spectra. Spectral variables discriminating control (positive variables) and autistic (negative variables) children are summarized. ( $R^2Y(\text{cum})=0.70$ ,  $Q^2=0.51$ , CV-ANOVA  $p=8.3710^{-8}$ ). (PAG: phenylacetylglutamine, Hip: hippurate, Gly: glycine, 3-MH: 3methyl histidine, glu: glutamate).

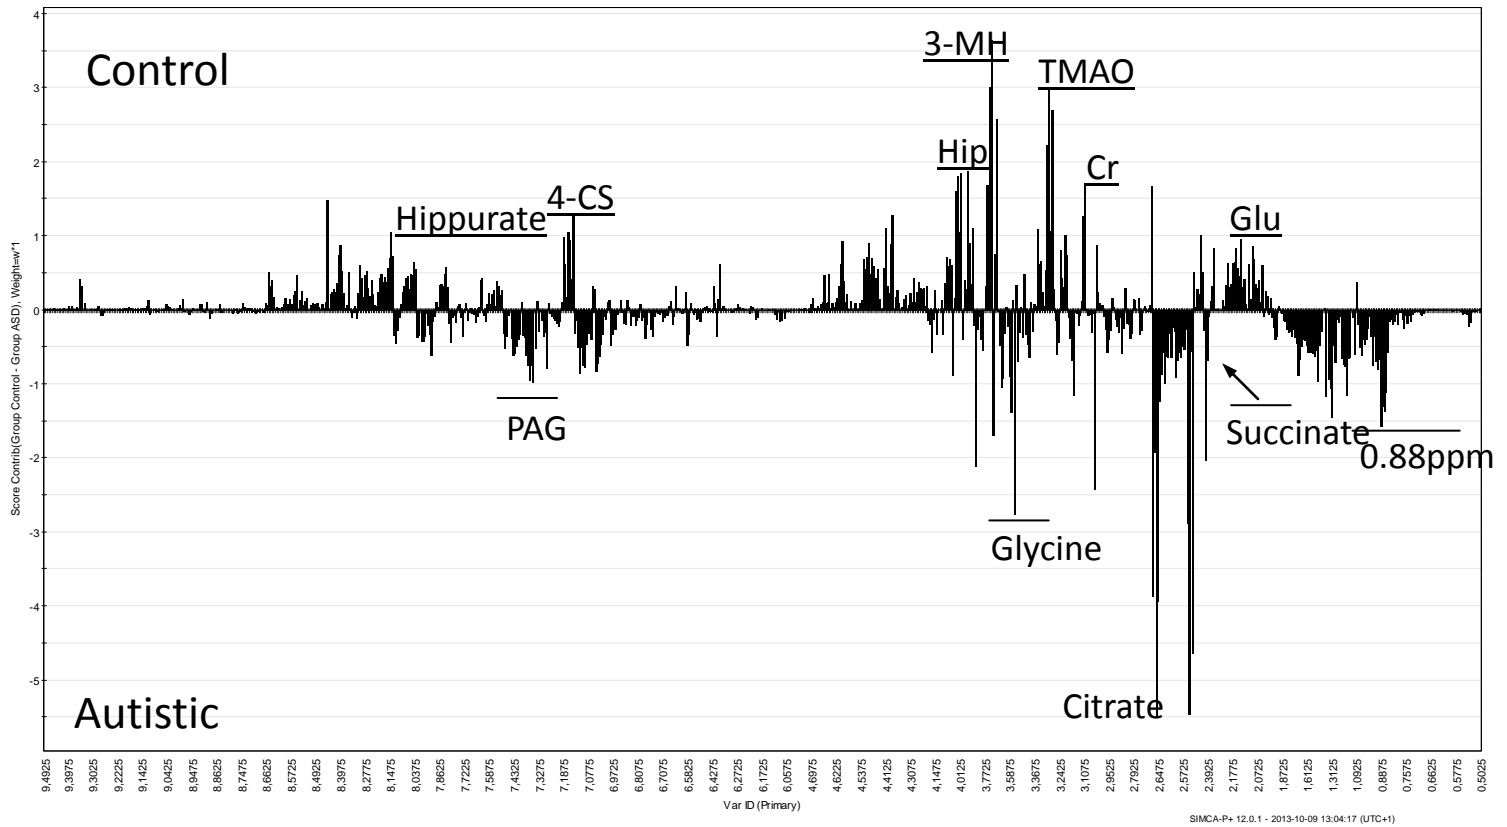

**Figure S4:** OPLS-DA scores scatter plot obtained from  $^1\text{H-NMR}$  urinary spectra of control (white circle) and autistic (black square) children. The NMR intensity bins were scaled to the creatinine spectral intensity. ( $R^2\text{X}(\text{cum})=0.356$ ,  $R^2\text{Y}(\text{cum})=0.69$ ,  $Q^2=0.36$ )

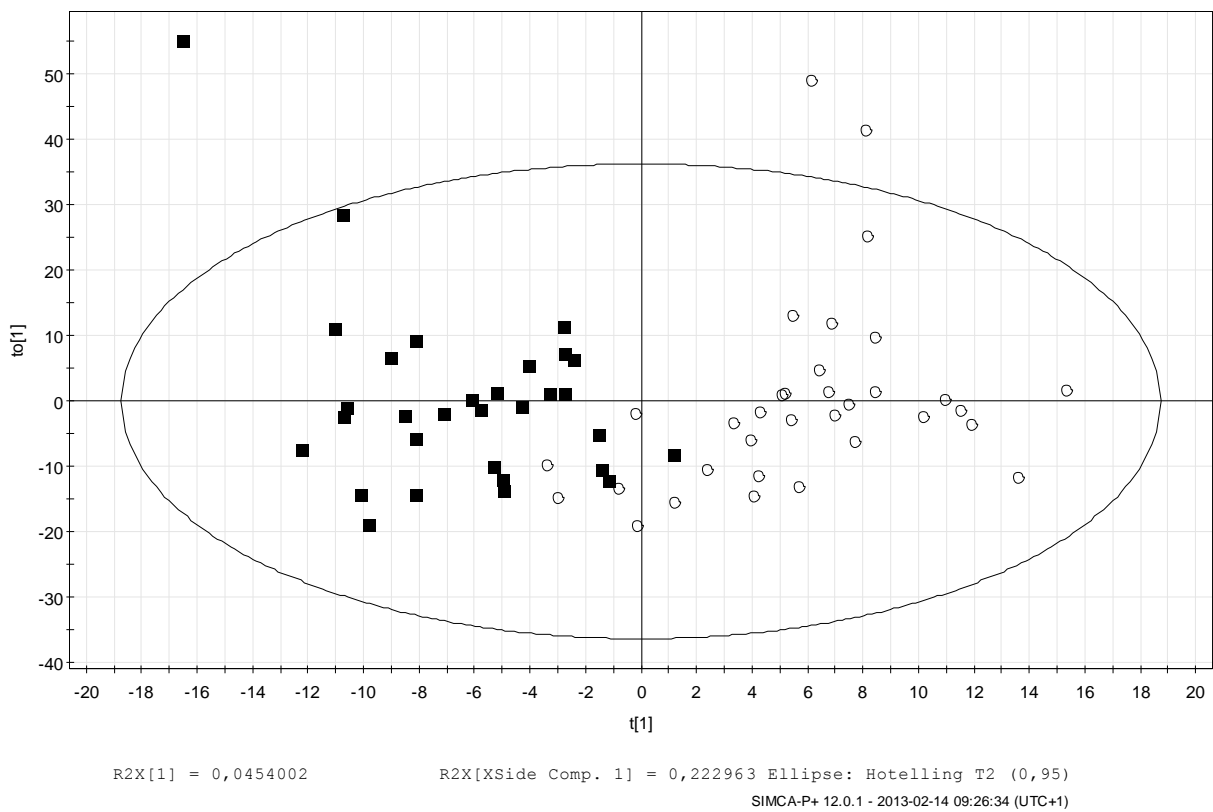

**Figure S5:** Receiver-operating characteristic (ROC) curves and area under curve (AUC) according to the three OPLS-DA models (a : 1H NMR data, b: 2D HSQC NMR cross-correlation, c: combined 1H NMR and HSQC NMR cross-correlation).

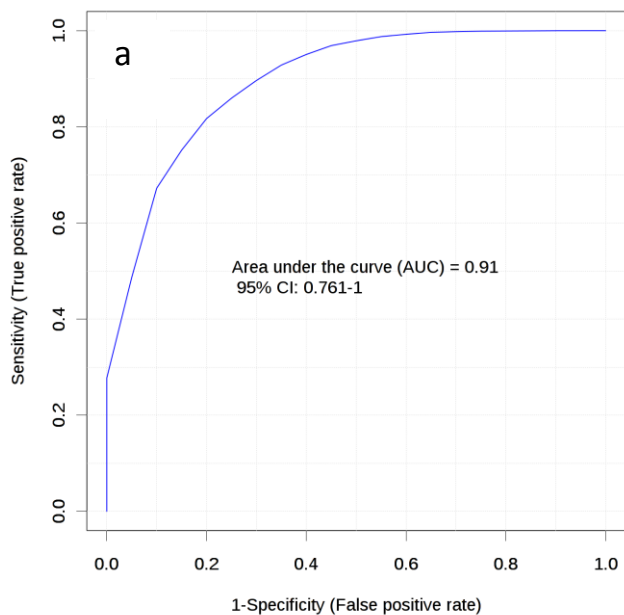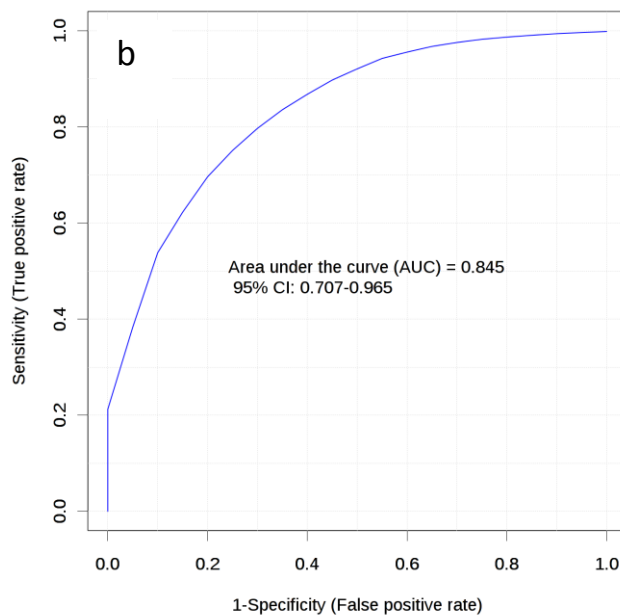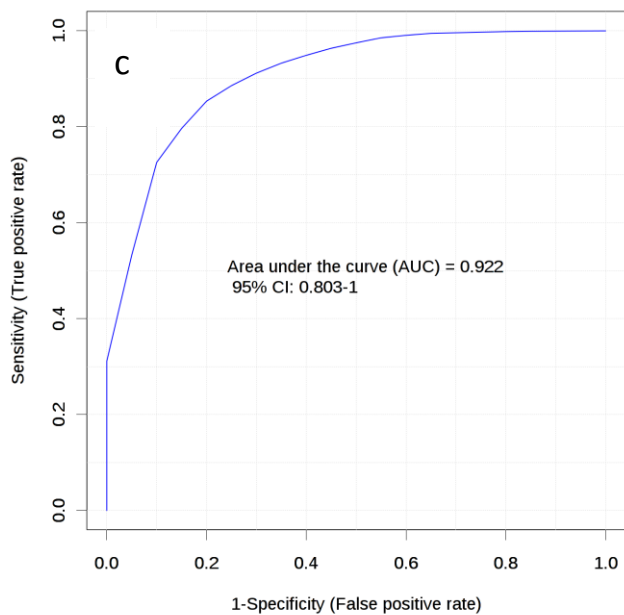

Supplement: c4an00552j1.pdf [file c4an00552j1.pdf]
